# Supplementary material for: Tick-Borne Pathogens in Dermacentor reticulatus Ticks from Bosnia and Herzegovina
Source: MDPI journal article supplement (doi:10.3390/pathogens13050421), 2024-05-16
Supplement: s1 [file s1]

| Supplementary Table 1. Meta data about sampling sites and methods, climatic condition and habitat in selected study areas of Bosnia and Herzegovina |                   |                   |         |         |       |                |                   |        |         |                   |          |                 |
|-----------------------------------------------------------------------------------------------------------------------------------------------------|-------------------|-------------------|---------|---------|-------|----------------|-------------------|--------|---------|-------------------|----------|-----------------|
| Date                                                                                                                                                | Municipality      | Location          | Adult F | Adult M | Total | Tick species   | Sampling method   | Host   | Weather | T (°C)            | Biotopes | Region B&H      |
| 10-03-23                                                                                                                                            | Livno             | Žabljak           | 1       | 1       | 2     | D. reticulatus | manual collection | sheep  | Sunny   | (-6 plus minus 3) |          | W and SW Bosnia |
| 10-03-23                                                                                                                                            | Livno             | Guber             | 3       | 2       | 5     | D. reticulatus | manual collection | dog    | Sunny   | (-6 plus minus 3) |          |                 |
| 19-04-23                                                                                                                                            | Cazin             | Krivaja           | 1       | 0       | 1     | D. reticulatus | manual collection | dog    | Sunny   | 5°C               |          |                 |
| 24-04-23                                                                                                                                            | Kupres            | Kupres            | 1       | 0       | 1     | D. reticulatus | manual collection | sheep  | Sunny   | 12°C              |          |                 |
| 24-04-23                                                                                                                                            | Tomislavgrad      | Tomislavgrad      | 3       | 0       | 3     | D. reticulatus | manual collection | sheep  | Sunny   | 13°C              |          |                 |
| 08-10-23                                                                                                                                            | Bihać             | Bihać             | 1       | 0       | 1     | D. reticulatus | manual collection | dog    | Sunny   | 22°C              |          |                 |
| 16-03-22                                                                                                                                            | Bihać             | Bihać             | 1       | 0       | 1     | D. reticulatus | manual collection | dog    | Sunny   | 14°C              |          |                 |
| 16-03-22                                                                                                                                            | Cazin             | Krivaja           | 0       | 1       | 1     | D. reticulatus | manual collection | dog    | Sunny   | 14°C              |          |                 |
| 16-03-22                                                                                                                                            | Velika Kladuša    | Velika Kladuša    | 1       | 0       | 1     | D. reticulatus | manual collection | dog    | Sunny   | 13-16°C           |          |                 |
| 23-09-22                                                                                                                                            | Glamoč            | Glamoč            | 1       | 0       | 1     | D. reticulatus | manual collection | dog    | Sunny   | 11°C              |          |                 |
| 06-02-21                                                                                                                                            | Livno             | Komorani          | 2       | 1       | 3     | D. reticulatus | manual collection | dog    | Cloudy  | Unrecorded        |          |                 |
| 20-05-21                                                                                                                                            | Livno             | Lištani           | 2       | 0       | 2     | D. reticulatus | manual collection | dog    | Cloudy  | 13°C              |          |                 |
| 22-03-21                                                                                                                                            | Bosanski Petrovac | Smoljana          | 2       | 2       | 4     | D. reticulatus | manual collection | dog    | Sunny   | 10°C              |          |                 |
| 20-05-21                                                                                                                                            | Livno             | Guber             | 2       | 1       | 3     | D. reticulatus | manual collection | dog    | Sunny   | 16°C              |          |                 |
| 14-04-21                                                                                                                                            | Bosanski Petrovac | Bosanski Petrovac | 1       | 1       | 2     | D. reticulatus | manual collection | cattle | Cloudy  | 17°C              |          |                 |
| 20-05-21                                                                                                                                            | Livno             | Podkraj           | 2       | 0       | 2     | D. reticulatus | manual collection | dog    | Sunny   | 15°C              |          |                 |

|          |                   |                   |   |   |   |                   |                      |            |            |            |        |
|----------|-------------------|-------------------|---|---|---|-------------------|----------------------|------------|------------|------------|--------|
| 04-09-21 | Livno             | Suhača            | 1 | 0 | 1 | D.<br>reticulatus | manual<br>collection | dog        | Sunny      | 15°C       |        |
| 04-09-21 | Livno             | Suhača            | 2 | 0 | 2 | D.<br>reticulatus | manual<br>collection | cat        | Sunny      | 15°C       |        |
| 04-09-21 | Livno             | Žabljak           | 1 | 1 | 2 | D.<br>reticulatus | manual<br>collection | dog        | Sunny      | 15°C       |        |
| 28-02-21 | Kupres            | Kupres            | 2 | 0 | 2 | D.<br>reticulatus | manual<br>collection | horse      | Unrecorded | 10°C       |        |
| 12-03-21 | Tomislavgrad      | Tomislavgrad      | 3 | 1 | 4 | D.<br>reticulatus | manual<br>collection | dog        | Unrecorded | 7°C        |        |
| 22-03-21 | Cazin             | Klis              | 1 | 0 | 1 | D.<br>reticulatus | manual<br>collection | dog        | Unrecorded | 16°C       |        |
| 22-03-21 | Bosanska<br>Krupa | Bosanska<br>Krupa | 2 | 1 | 3 | D.<br>reticulatus | manual<br>collection | goat       | Unrecorded | 16°C       |        |
| 24-03-21 | Bužim             | Bužim             | 2 | 1 | 3 | D.<br>reticulatus | manual<br>collection | dog        | Unrecorded | 16°C       |        |
| 24-03-21 | Bihać             | Bihać             | 3 | 0 | 3 | D.<br>reticulatus | manual<br>collection | dog        | Unrecorded | 16°C       |        |
| 24-03-21 | Glamoč            | Glamoč            | 2 | 0 | 2 | D.<br>reticulatus | manual<br>collection | dog        | Unrecorded | 17°C       |        |
| 27-03-20 | Cazin             | Cazin             | 1 | 0 | 1 | D.<br>reticulatus | manual<br>collection | dog        | Unrecorded | 10°C       |        |
| 10-03-20 | Livno             | Žabljak           | 2 | 0 | 2 | D.<br>reticulatus | manual<br>collection | dog        | Sunny      | Unrecorded |        |
| 23-10-20 | Livno             | Guber             | 2 | 0 | 2 | D.<br>reticulatus | manual<br>collection | dog        | Sunny      | 23°C       |        |
| 23-10-20 | Livno             | Suhača            | 3 | 0 | 3 | D.<br>reticulatus | manual<br>collection | dog        | Cloudy     | 22°C       |        |
| 23-10-20 | Livno             | Livno             | 1 | 0 | 1 | D.<br>reticulatus | manual<br>collection | dog        | Sunny      | 13°C       |        |
| 23-10-20 | Livno             | Podhum            | 2 | 0 | 2 | D.<br>reticulatus | manual<br>collection | dog        | Cloudy     | 20°C       |        |
| 08-04-18 | Tomislavgrad      | Tomislavgrad      | 1 | 0 | 1 | D.<br>reticulatus | manual<br>collection | dog        | Unrecorded | 18°C       |        |
| 05-05-18 | Bužim             | Bužim             | 1 | 0 | 1 | D.<br>reticulatus | manual<br>collection | dog        | Unrecorded | 21°C       |        |
| 18-05-18 | Livno             | Livno             | 1 | 0 | 1 | D.<br>reticulatus | dragging             | vegetation | Unrecorded | 23°C       | meadow |

|          |                   |                   |   |   |   |                   |                      |            |            |            |        |                   |
|----------|-------------------|-------------------|---|---|---|-------------------|----------------------|------------|------------|------------|--------|-------------------|
| 19-10-18 | Bužim             | Bužim             | 1 | 0 | 1 | D.<br>reticulatus | manual<br>collection | dog        | Unrecorded | 18°C       |        |                   |
| 14-05-18 | Bihać             | Bihać             | 1 | 0 | 1 | D.<br>reticulatus | manual<br>collection | dog        | Unrecorded | 19°C       |        |                   |
| 28-09-17 | Livno             | Livno             | 1 | 0 | 1 | D.<br>reticulatus | manual<br>collection | horse      | Unrecorded | 22°C       |        |                   |
| 09-04-17 | Velika<br>Kladuša | Velika<br>Kladuša | 1 | 0 | 1 | D.<br>reticulatus | manual<br>collection | goat       | Unrecorded | 17°C       |        |                   |
| 10-04-17 | Bosanska<br>Krupa | Bosanska<br>Krupa | 1 | 0 | 1 | D.<br>reticulatus | dragging             | vegetation | Unrecorded | 15°C       | meadow |                   |
| 20-04-23 | Sarajevo          | Hadžići           | 1 | 1 | 2 | D.<br>reticulatus | manual<br>collection | cat        | Cloudy     | Unrecorded |        | Central<br>Bosnia |
| 20-04-23 | Sarajevo          | Ilidža            | 2 | 1 | 3 | D.<br>reticulatus | manual<br>collection | dog        | Sunny      | Unrecorded |        |                   |
| 21-04-23 | Sarajevo          | Ilijaš            | 2 | 1 | 3 | D.<br>reticulatus | manual<br>collection | dog        | Sunny      | Unrecorded |        |                   |
| 23-04-23 | Sarajevo          | Novo<br>Sarajevo  | 3 | 1 | 4 | D.<br>reticulatus | manual<br>collection | dog        | Cloudy     | Unrecorded | meadow |                   |
| 23-04-23 | Sarajevo          | Novi Grad         | 2 | 1 | 3 | D.<br>reticulatus | manual<br>collection | dog        | Cloudy     | Unrecorded |        |                   |
| 24-04-23 | Sarajevo          | Vogošća           | 2 | 1 | 3 | D.<br>reticulatus | manual<br>collection | dog        | Sunny      | Unrecorded |        |                   |
| 27-04-23 | Breza             | Breza             | 3 | 1 | 4 | D.<br>reticulatus | manual<br>collection | dog        | Sunny      | Unrecorded |        |                   |
| 13-05-23 | Bugojno           | Bugojno           | 3 | 1 | 4 | D.<br>reticulatus | manual<br>collection | dog        | Sunny      | 13°C       |        |                   |
| 19-09-22 | Vareš             | Vareš             | 2 | 0 | 2 | D.<br>reticulatus | manual<br>collection | cat        | Sunny      | Unrecorded |        |                   |
| 27-05-22 | Zenica            | Zenica            | 2 | 0 | 2 | D.<br>reticulatus | manual<br>collection | dog        | Sunny      | Unrecorded |        |                   |
| 27-05-22 | Visoko            | Visoko            | 2 | 0 | 2 | D.<br>reticulatus | manual<br>collection | dog        | Sunny      | Unrecorded |        |                   |
| 07-04-22 | Pale              | Pale              | 2 | 0 | 2 | D.<br>reticulatus | manual<br>collection | dog        | Sunny      | Unrecorded |        |                   |
| 16-03-22 | Bugojno           | Bugojno           | 3 | 3 | 6 | D.<br>reticulatus | manual<br>collection | dog        | Sunny      | Unrecorded |        |                   |
| 15-03-22 | Trnovo            | Trnovo            | 4 | 0 | 4 | D.<br>reticulatus | manual<br>collection | dog        | Cloudy     | 12°C       |        |                   |

|          |          |                  |   |   |   |                   |                      |     |        |            |  |
|----------|----------|------------------|---|---|---|-------------------|----------------------|-----|--------|------------|--|
| 02-04-21 | Bugojno  | Bugojno          | 3 | 0 | 3 | D.<br>reticulatus | manual<br>collection | dog | Cloudy | 18°C       |  |
| 10-05-21 | Sarajevo | Novo<br>Sarajevo | 5 | 2 | 7 | D.<br>reticulatus | manual<br>collection | dog | Sunny  | 17°C       |  |
| 14-06-21 | Sarajevo | Novi Grad        | 3 | 1 | 4 | D.<br>reticulatus | manual<br>collection | dog | Sunny  | 18°C       |  |
| 14-06-21 | Sarajevo | Stari Grad       | 2 | 1 | 3 | D.<br>reticulatus | manual<br>collection | cat | Sunny  | 18°C       |  |
| 10-05-21 | Trnovo   | Trnovo           | 1 | 0 | 1 | D.<br>reticulatus | manual<br>collection | cat | Sunny  | 15°C       |  |
| 22-04-21 | Sarajevo | Hadžići          | 1 | 0 | 1 | D.<br>reticulatus | manual<br>collection | dog | Sunny  | 12°C       |  |
| 22-04-21 | Sarajevo | Ilidža           | 3 | 0 | 3 | D.<br>reticulatus | manual<br>collection | dog | Sunny  | 12°C       |  |
| 22-04-21 | Sarajevo | Ilijaš           | 5 | 1 | 6 | D.<br>reticulatus | manual<br>collection | dog | Sunny  | 12°C       |  |
| 24-04-21 | Sarajevo | Vogošća          | 3 | 0 | 3 | D.<br>reticulatus | manual<br>collection | dog | Sunny  | 12°C       |  |
| 23-04-21 | Sarajevo | Centar           | 1 | 0 | 1 | D.<br>reticulatus | manual<br>collection | dog | Cloudy | 12°C       |  |
| 09-05-21 | Zenica   | Zenica           | 2 | 0 | 2 | D.<br>reticulatus | manual<br>collection | dog | Sunny  | 14°C       |  |
| 09-05-21 | Visoko   | Visoko           | 1 | 0 | 1 | D.<br>reticulatus | manual<br>collection | dog | Sunny  | 14°C       |  |
| 04-07-21 | Breza    | Breza            | 1 | 1 | 2 | D.<br>reticulatus | manual<br>collection | dog | Sunny  | 21°C       |  |
| 10-10-21 | Sarajevo | Ilidža           | 3 | 2 | 5 | D.<br>reticulatus | manual<br>collection | dog | Sunny  | 19°C       |  |
| 28-03-20 | Sarajevo | Ilijaš           | 1 | 0 | 1 | D.<br>reticulatus | manual<br>collection | dog | Sunny  | Unrecorded |  |
| 22-03-20 | Sarajevo | Novo<br>Sarajevo | 3 | 1 | 4 | D.<br>reticulatus | manual<br>collection | dog | Sunny  | Unrecorded |  |
| 22-03-20 | Sarajevo | Novi Grad        | 1 | 1 | 2 | D.<br>reticulatus | manual<br>collection | dog | Sunny  | Unrecorded |  |
| 22-03-20 | Sarajevo | Vogošća          | 2 | 0 | 2 | D.<br>reticulatus | manual<br>collection | dog | Sunny  | Unrecorded |  |
| 22-03-20 | Trnovo   | Trnovo           | 2 | 1 | 3 | D.<br>reticulatus | manual<br>collection | dog | Sunny  | Unrecorded |  |

|          |          |                  |   |   |   |                   |                      |     |        |            |  |             |
|----------|----------|------------------|---|---|---|-------------------|----------------------|-----|--------|------------|--|-------------|
| 19-03-20 | Visoko   | Visoko           | 2 | 2 | 4 | D.<br>reticulatus | manual<br>collection | dog | Sunny  | Unrecorded |  |             |
| 26-03-19 | Sarajevo | Centar           | 1 | 2 | 3 | D.<br>reticulatus | manual<br>collection | dog | Sunny  | Unrecorded |  |             |
| 27-03-19 | Sarajevo | Stari Grad       | 1 | 0 | 1 | D.<br>reticulatus | manual<br>collection | dog | Sunny  | Unrecorded |  |             |
| 28-03-19 | Trnovo   | Trnovo           | 3 | 2 | 5 | D.<br>reticulatus | manual<br>collection | dog | Sunny  | Unrecorded |  |             |
| 11-04-19 | Sarajevo | Nahorevo         | 2 | 1 | 3 | D.<br>reticulatus | manual<br>collection | dog | Cloudy | Unrecorded |  |             |
| 11-04-19 | Sarajevo | Novi Grad        | 1 | 1 | 2 | D.<br>reticulatus | manual<br>collection | dog | Sunny  | Unrecorded |  |             |
| 12-04-19 | Sarajevo | Centar           | 2 | 1 | 3 | D.<br>reticulatus | manual<br>collection | dog | Sunny  | Unrecorded |  |             |
| 15-04-19 | Sarajevo | Bjelašnica       | 2 | 0 | 2 | D.<br>reticulatus | manual<br>collection | dog | Sunny  | Unrecorded |  |             |
| 17-04-19 | Sarajevo | Hadžići          | 6 | 2 | 8 | D.<br>reticulatus | manual<br>collection | dog | Sunny  | Unrecorded |  |             |
| 16-05-19 | Sarajevo | Ilidža           | 6 | 1 | 7 | D.<br>reticulatus | manual<br>collection | dog | Sunny  | Unrecorded |  |             |
| 28-05-18 | Zenica   | Zenica           | 3 | 1 | 4 | D.<br>reticulatus | manual<br>collection | cat | Cloudy | Unrecorded |  |             |
| 24-10-18 | Sarajevo | Otoka            | 3 | 1 | 4 | D.<br>reticulatus | manual<br>collection | dog | Sunny  | 19°C       |  |             |
| 05-05-17 | Sarajevo | Novo<br>Sarajevo | 0 | 1 | 1 | D.<br>reticulatus | manual<br>collection | dog | Sunny  | 17°C       |  |             |
| 12-05-17 | Sarajevo | Novi Grad        | 1 | 0 | 1 | D.<br>reticulatus | manual<br>collection | dog | Sunny  | 21°C       |  |             |
| 20-04-17 | Sarajevo | Vogošća          | 1 | 1 | 2 | D.<br>reticulatus | manual<br>collection | dog | Sunny  | 18°C       |  |             |
| 22-03-17 | Trnovo   | Trnovo           | 3 | 2 | 5 | D.<br>reticulatus | manual<br>collection | dog | Sunny  | 13°C       |  |             |
| 18-02-23 | Mostar   | Mostar           | 2 | 1 | 3 | D.<br>reticulatus | manual<br>collection | dog | Sunny  | 8°C        |  | Herzegovina |
| 22-02-23 | Mostar   | Rodoč            | 2 | 0 | 2 | D.<br>reticulatus | manual<br>collection | dog | Sunny  | 10°C       |  |             |
| 09-03-23 | Stolac   | Stolac           | 1 | 0 | 1 | D.<br>reticulatus | manual<br>collection | dog | Sunny  | 10°C       |  |             |

|          |           |           |   |   |   |                   |                      |            |       |            |        |
|----------|-----------|-----------|---|---|---|-------------------|----------------------|------------|-------|------------|--------|
| 14-04-23 | Jablanica | Jablanica | 1 | 1 | 2 | D.<br>reticulatus | manual<br>collection | dog        | Sunny | 13°C       |        |
| 14-04-23 | Konjic    | Konjic    | 1 | 0 | 1 | D.<br>reticulatus | manual<br>collection | dog        | Sunny | 13°C       |        |
| 22-04-23 | Berkovići | Berkovići | 1 | 0 | 1 | D.<br>reticulatus | manual<br>collection | dog        | Sunny | Unrecorded |        |
| 22-04-23 | Nevesinje | Nevesinje | 2 | 0 | 2 | D.<br>reticulatus | manual<br>collection | dog        | Sunny | Unrecorded |        |
| 22-04-23 | Bileća    | Bileća    | 0 | 2 | 2 | D.<br>reticulatus | manual<br>collection | sheep      | Sunny | Unrecorded |        |
| 23-04-23 | Čitluk    | Čitluk    | 2 | 0 | 2 | D.<br>reticulatus | manual<br>collection | dog        | Sunny | Unrecorded |        |
| 23-04-23 | Međugorje | Međugorje | 6 | 1 | 7 | D.<br>reticulatus | dragging             | vegetation | Sunny | Unrecorded | meadow |
| 23-04-23 | Međugorje | Međugorje | 5 | 1 | 6 | D.<br>reticulatus | manual<br>collection | dog        | Sunny | Unrecorded |        |
| 23-04-23 | Ljubuški  | Ljubuški  | 1 | 0 | 1 | D.<br>reticulatus | manual<br>collection | dog        | Sunny | Unrecorded |        |
| 18-04-23 | Gacko     | Gacko     | 1 | 0 | 1 | D.<br>reticulatus | manual<br>collection | dog        | Sunny | 15°C       |        |
| 08-06-23 | Čapljina  | Čapljina  | 1 | 0 | 1 | D.<br>reticulatus | manual<br>collection | dog        | Sunny | 20°C       |        |
| 01-09-23 | Grude     | Grude     | 2 | 0 | 2 | D.<br>reticulatus | manual<br>collection | dog        | Sunny | 21°C       |        |
| 03-09-22 | Mostar    | Mostar    | 1 | 0 | 1 | D.<br>reticulatus | manual<br>collection | dog        | Sunny | 23°C       |        |
| 03-09-22 | Međugorje | Međugorje | 3 | 0 | 3 | D.<br>reticulatus | manual<br>collection | dog        | Sunny | 23°C       |        |
| 12-09-22 | Jablanica | Jablanica | 2 | 2 | 4 | D.<br>reticulatus | manual<br>collection | dog        | Sunny | 19°C       |        |
| 16-06-22 | Čapljina  | Čapljina  | 1 | 0 | 1 | D.<br>reticulatus | manual<br>collection | dog        | Sunny | 21°C       |        |
| 27-05-22 | Nevesinje | Nevesinje | 2 | 0 | 2 | D.<br>reticulatus | manual<br>collection | cattle     | Sunny | 18°C       |        |
| 07-04-22 | Mostar    | Mostar    | 3 | 0 | 3 | D.<br>reticulatus | manual<br>collection | dog        | Sunny | 11°C       |        |
| 16-03-22 | Mostar    | Mostar    | 2 | 0 | 2 | D.<br>reticulatus | manual<br>collection | dog        | Sunny | 13°C       |        |

|          |           |           |   |   |   |                   |                      |            |       |            |        |
|----------|-----------|-----------|---|---|---|-------------------|----------------------|------------|-------|------------|--------|
| 15-03-22 | Jablanica | Jablanica | 4 | 0 | 4 | D.<br>reticulatus | manual<br>collection | dog        | Sunny | 12°C       |        |
| 10-02-21 | Čapljina  | Čapljina  | 1 | 0 | 1 | D.<br>reticulatus | manual<br>collection | dog        | Sunny | Unrecorded |        |
| 21-03-21 | Međugorje | Međugorje | 6 | 0 | 6 | D.<br>reticulatus | manual<br>collection | dog        | Sunny | 15°C       |        |
| 21-03-21 | Stolac    | Stolac    | 2 | 0 | 2 | D.<br>reticulatus | manual<br>collection | cattle     | Sunny | 15°C       |        |
| 06-02-21 | Čitluk    | Čitluk    | 2 | 0 | 2 | D.<br>reticulatus | manual<br>collection | dog        | Sunny | Unrecorded |        |
| 06-02-21 | Ljubuški  | Ljubuški  | 2 | 0 | 2 | D.<br>reticulatus | manual<br>collection | dog        | Sunny | Unrecorded |        |
| 21-09-21 | Mostar    | Rodoč     | 3 | 0 | 3 | D.<br>reticulatus | manual<br>collection | dog        | Sunny | 17°C       |        |
| 22-09-21 | Mostar    | Buna      | 1 | 0 | 1 | D.<br>reticulatus | dragging             | vegetation | Sunny | 17°C       | meadow |
| 22-09-21 | Čapljina  | Čapljina  | 1 | 0 | 1 | D.<br>reticulatus | manual<br>collection | dog        | Sunny | 17°C       |        |
| 14-10-21 | Jablanica | Jablanica | 1 | 1 | 2 | D.<br>reticulatus | manual<br>collection | dog        | Sunny | 17°C       |        |
| 28-03-20 | Stolac    | Stolac    | 1 | 1 | 2 | D.<br>reticulatus | manual<br>collection | dog        | Sunny | 14°C       |        |
| 25-03-20 | Mostar    | Mostar    | 1 | 0 | 1 | D.<br>reticulatus | manual<br>collection | dog        | Sunny | 16°C       |        |
| 25-03-20 | Jablanica | Jablanica | 4 | 1 | 5 | D.<br>reticulatus | manual<br>collection | dog        | Sunny | 15°C       |        |
| 25-03-20 | Konjic    | Konjic    | 3 | 0 | 3 | D.<br>reticulatus | manual<br>collection | dog        | Sunny | 16°C       |        |
| 25-03-20 | Mostar    | Buna      | 2 | 0 | 2 | D.<br>reticulatus | manual<br>collection | cat        | Sunny | 17°C       |        |
| 25-03-20 | Mostar    | Mostar    | 2 | 0 | 2 | D.<br>reticulatus | manual<br>collection | dog        | Sunny | 17°C       |        |
| 25-03-20 | Čapljina  | Čapljina  | 1 | 0 | 1 | D.<br>reticulatus | manual<br>collection | dog        | Sunny | 17°C       |        |
| 20-09-20 | Jablanica | Jablanica | 1 | 1 | 2 | D.<br>reticulatus | manual<br>collection | dog        | Sunny | 14°C       |        |
| 07-05-19 | Konjic    | Konjic    | 2 | 0 | 2 | D.<br>reticulatus | manual<br>collection | dog        | Sunny | 15°C       |        |

|          |           |           |   |   |   |                   |                      |            |       |      |            |          |
|----------|-----------|-----------|---|---|---|-------------------|----------------------|------------|-------|------|------------|----------|
| 28-05-19 | Stolac    | Stolac    | 1 | 0 | 1 | D.<br>reticulatus | manual<br>collection | dog        | Sunny | 17°C |            |          |
| 19-03-18 | Jablanica | Jablanica | 3 | 0 | 3 | D.<br>reticulatus | manual<br>collection | dog        | Sunny | 11°C |            |          |
| 08-04-18 | Čapljina  | Čapljina  | 1 | 0 | 1 | D.<br>reticulatus | manual<br>collection | dog        | Sunny | 14°C |            |          |
| 18-07-18 | Berkovići | Berkovići | 1 | 0 | 1 | D.<br>reticulatus | manual<br>collection | dog        | Sunny | 20°C |            |          |
| 17-09-23 | Bileća    | Bileća    | 2 | 0 | 2 | D.<br>reticulatus | dragging             | vegetation | Sunny | 19°C | underbrush |          |
| 18-07-18 | Bileća    | Bileća    | 2 | 0 | 2 | D.<br>reticulatus | manual<br>collection | dog        | Sunny | 20°C |            |          |
| 19-09-18 | Ljubuški  | Ljubuški  | 1 | 0 | 1 | D.<br>reticulatus | manual<br>collection | dog        | Sunny | 18°C |            |          |
| 17-06-18 | Grude     | Grude     | 3 | 0 | 3 | D.<br>reticulatus | manual<br>collection | horse      | Sunny | 18°C |            |          |
| 18-09-17 | Stolac    | Stolac    | 2 | 0 | 2 | D.<br>reticulatus | manual<br>collection | goat       | Sunny | 17°C |            |          |
| 10-06-17 | Konjic    | Konjic    | 1 | 0 | 1 | D.<br>reticulatus | manual<br>collection | dog        | Sunny | 15°C |            |          |
| 10-06-17 | Jablanica | Jablanica | 3 | 0 | 3 | D.<br>reticulatus | manual<br>collection | dog        | Sunny | 14°C |            |          |
| 10-06-17 | Čitluk    | Čitluk    | 1 | 1 | 2 | D.<br>reticulatus | manual<br>collection | dog        | Sunny | 16°C |            |          |
| 10-06-17 | Ljubuški  | Ljubuški  | 1 | 0 | 1 | D.<br>reticulatus | manual<br>collection | dog        | Sunny | 16°C |            |          |
| 23-04-17 | Mostar    | Mostar    | 1 | 0 | 1 | D.<br>reticulatus | manual<br>collection | dog        | Sunny | 15°C |            | E Bosnia |
| 07-04-22 | Foča      | Tjentište | 1 | 0 | 1 | D.<br>reticulatus | manual<br>collection | dog        | Sunny | 13°C |            |          |
| 16-03-22 | Goražde   | Goražde   | 1 | 0 | 1 | D.<br>reticulatus | manual<br>collection | dog        | Sunny | 13°C |            |          |
| 15-09-22 | Goražde   | Goražde   | 1 | 0 | 1 | D.<br>reticulatus | manual<br>collection | dog        | Sunny | 16°C |            |          |
| 02-03-21 | Rudo      | Rudo      | 1 | 0 | 1 | D.<br>reticulatus | manual<br>collection | dog        | Sunny | 9°C  |            |          |
| 28-03-20 | Rogatica  | Rogatica  | 1 | 0 | 1 | D.<br>reticulatus | manual<br>collection | dog        | Sunny | 15°C |            |          |



|          |            |            |   |   |   |                   |                      |     |       |            |  |  |
|----------|------------|------------|---|---|---|-------------------|----------------------|-----|-------|------------|--|--|
| 22-03-20 | Goražde    | Goražde    | 0 | 1 | 1 | D.<br>reticulatus | manual<br>collection | dog | Sunny | 13-14°C    |  |  |
| 16-05-19 | Srebrenica | Srebrenica | 1 | 0 | 1 | D.<br>reticulatus | manual<br>collection | dog | Sunny | 15°C       |  |  |
| 24-05-23 | Banja Luka | Banja Luka | 1 | 1 | 2 | D.<br>reticulatus | manual<br>collection | dog | Sunny | 13°C       |  |  |
| 21-06-23 | Tuzla      | Tuzla      | 2 | 2 | 4 | D.<br>reticulatus | manual<br>collection | dog | Sunny | 17°C       |  |  |
| 21-06-23 | Srebrenik  | Srebrenik  | 5 | 0 | 5 | D.<br>reticulatus | manual<br>collection | dog | Sunny | 17°C       |  |  |
| 25-03-22 | Banja Luka | Banja Luka | 1 | 0 | 1 | D.<br>reticulatus | manual<br>collection | dog | Sunny | 14°C       |  |  |
| 25-03-22 | Laktaši    | Laktaši    | 1 | 0 | 1 | D.<br>reticulatus | manual<br>collection | dog | Sunny | 13-15°C    |  |  |
| 25-03-22 | Ključ      | Ključ      | 1 | 0 | 1 | D.<br>reticulatus | manual<br>collection | dog | Sunny | Unrecorded |  |  |
| 12-09-22 | Tešanj     | Tešanj     | 1 | 0 | 1 | D.<br>reticulatus | manual<br>collection | dog | Sunny | Unrecorded |  |  |
| 13-09-22 | Banja Luka | Banja Luka | 1 | 0 | 1 | D.<br>reticulatus | manual<br>collection | dog | Sunny | Unrecorded |  |  |
| 22-09-22 | Laktaši    | Laktaši    | 1 | 2 | 3 | D.<br>reticulatus | manual<br>collection | dog | Sunny | Unrecorded |  |  |
| 10-05-21 | Ključ      | Ključ      | 4 | 3 | 7 | D.<br>reticulatus | manual<br>collection | dog | Sunny | 14°C       |  |  |
| 10-05-21 | Banja Luka | Banja Luka | 1 | 0 | 1 | D.<br>reticulatus | manual<br>collection | dog | Sunny | 16°C       |  |  |
| 12-09-20 | Laktaši    | Laktaši    | 1 | 0 | 1 | D.<br>reticulatus | manual<br>collection | dog | Sunny | Unrecorded |  |  |
| 19-04-20 | Tuzla      | Tuzla      | 2 | 2 | 4 | D.<br>reticulatus | manual<br>collection | dog | Sunny | 15°C       |  |  |
| 21-05-20 | Laktaši    | Laktaši    | 2 | 0 | 2 | D.<br>reticulatus | manual<br>collection | dog | Sunny | Unrecorded |  |  |
| 21-05-20 | Ključ      | Ključ      | 1 | 0 | 1 | D.<br>reticulatus | manual<br>collection | dog | Sunny | Unrecorded |  |  |
| 28-05-19 | Živinice   | Živinice   | 1 | 0 | 1 | D.<br>reticulatus | manual<br>collection | dog | Sunny | 16°C       |  |  |
| 19-03-18 | Tuzla      | Tuzla      | 5 | 1 | 6 | D.<br>reticulatus | manual<br>collection | dog | Sunny | Unrecorded |  |  |

N and NE  
Bosnia

|          |           |           |   |   |   |                   |                      |     |       |            |  |  |
|----------|-----------|-----------|---|---|---|-------------------|----------------------|-----|-------|------------|--|--|
| 08-04-18 | Gračanica | Gračanica | 1 | 0 | 1 | D.<br>reticulatus | manual<br>collection | dog | Sunny | Unrecorded |  |  |
| 15-07-18 | Srebrenik | Srebrenik | 1 | 1 | 2 | D.<br>reticulatus | manual<br>collection | dog | Sunny | 16-18°C    |  |  |
| 15-07-18 | Lukavac   | Lukavac   | 1 | 1 | 2 | D.<br>reticulatus | manual<br>collection | dog | Sunny | 16-18°C    |  |  |
| 15-07-18 | Tuzla     | Tuzla     | 1 | 1 | 2 | D.<br>reticulatus | manual<br>collection | dog | Sunny | 16-18°C    |  |  |
